# Supplementary material for: Estimating intraclonal heterogeneity and subpopulation changes from bulk expression profiles in CMap
Source: Life Sci Alliance. 2022 Jun 10;5(10):e202101299. doi: 10.26508/lsa.202101299 (PMC9187873; doi:10.26508/lsa.202101299)
Supplement: Supplementary file 3 [file LSA-2021-01299_TableS2.xls]

## Sheet: 工作表1
k_max	Archetypes num	subpopulations num
30	17	10
40	20	9
50	22	10
60	23	9
70	24	9
80	23	9
90	24	9
100	22	9
Table S2. Archetype and subpopulation counts by ACTIONet. The resulting numbers of archetypes and subpopulations with the corresponding “k_max” ACTIONet’s parameter were recorded in the table. k_max was eventually set as 30 since ACTIONet was able to identify the most subpopulations (10 subpopulations) with the least number of archetypes (17 archetypes).
